# Supplementary material for: Organophosphate and organohalogen flame-retardant exposure and thyroid hormone disruption in a cohort of female firefighters and office workers from San Francisco
Source: bioRxiv or medRxiv preprint supplement (doi:10.1101/2020.10.06.20207498), 2020-10-21
Supplement: Supplementary file [file media-1.pdf]

## Supplemental Information

**Table S1.** Descriptive statistics and percentiles of flame-retardant<sup>a</sup> measurements for firefighters (n= 86) and office workers (n= 84)

| Chemical     | Group         | LOD | DF% | GM (GSD)    | Percentiles |       |        |       |
|--------------|---------------|-----|-----|-------------|-------------|-------|--------|-------|
|              |               |     |     |             | 25th        | 50th  | 75th   | 95th  |
| <b>BCEP</b>  |               |     |     |             |             |       |        |       |
|              | Firefighter   | 0.1 | 78  | 0.85 (5.74) | 0.23        | 1.22  | 3.98   | 8.51  |
|              | Office worker | 0.1 | 39  | <LOD        | <LOD        | <LOD  | 0.485  | 3.31  |
| <b>BDCPP</b> |               |     |     |             |             |       |        |       |
|              | Firefighter   | 0.2 | 100 | 4.08 (4.53) | 1.30        | 5.37  | 13.3   | 32.22 |
|              | Office worker | 0.2 | 90  | 0.96 (3.99) | <LOD        | 0.92  | 2.3425 | 8.72  |
| <b>DBuP</b>  |               |     |     |             |             |       |        |       |
|              | Firefighter   | 0.1 | 83  | 0.41 (3.92) | 0.15        | 0.495 | 1.2575 | 3.04  |
|              | Office worker | 0.1 | 29  | <LOD        | <LOD        | <LOD  | 0.1275 | 0.56  |
| <b>BDzP</b>  |               |     |     |             |             |       |        |       |
|              | Firefighter   | 0.2 | 7   | <LOD        | <LOD        | <LOD  | <LOD   | 0.22  |
|              | Office worker | 0.2 | 0   | <LOD        | <LOD        | <LOD  | <LOD   | <LOD  |
| <b>DoCP</b>  |               |     |     |             |             |       |        |       |
|              | Firefighter   | 0.1 | 9   | <LOD        | <LOD        | <LOD  | <LOD   | 0.15  |
|              | Office worker | 0.1 | 1   | <LOD        | <LOD        | <LOD  | <LOD   | <LOD  |
| <b>DpCP</b>  |               |     |     |             |             |       |        |       |
|              | Firefighter   | 0.1 | 41  | <LOD        | <LOD        | <LOD  | 0.2275 | 0.45  |
|              | Office worker | 0.1 | 17  | <LOD        | <LOD        | <LOD  | <LOD   | 0.20  |
| <b>TBBA</b>  |               |     |     |             |             |       |        |       |
|              | Firefighter   | 0.2 | 24  | <LOD        | <LOD        | <LOD  | <LOD   | 0.42  |
|              | Office worker | 0.2 | 8   | <LOD        | <LOD        | <LOD  | <LOD   | 0.24  |
| <b>TBBPA</b> |               |     |     |             |             |       |        |       |
|              | Firefighter   | 0.2 | 45  | <LOD        | <LOD        | <LOD  | 0.41   | 0.96  |
|              | Office worker | 0.2 | 42  | <LOD        | <LOD        | <LOD  | 0.29   | 0.64  |

Abbreviations: LOD = Limit of Detection; DF = Detection Frequency; GM = Geometric mean; GSD = geometric standard deviation

<sup>a</sup>2,2',4,4'-Tetrabromodiphenyl ether (OH-BDE 47) and 1,3,5-Tribromo-2-(2,4-dibromophenoxy)benzene (OH-BDE 100) were also quantified but not detected in participant's samples.

**Table S2.**  $\beta$ (95%CI) and percent change (95% confidence intervals) in TSH levels for each doubling of exposure of continuous BDCPP, BCEP and DBuP in the full cohort in adjusted<sup>a</sup> OLS regression models

|                             | <b>Model</b> | <b><math>\beta</math>(95%CI)</b> | <b>Percent change (95%CI)</b> |
|-----------------------------|--------------|----------------------------------|-------------------------------|
| Full cohort                 |              |                                  |                               |
|                             | BDCPP        | -0.006 (-0.110,0.098)            | -0.408 (-7.323,7.024)         |
|                             | BCEP         | -0.069 (-0.161,0.024)            | -4.657 (-10.572,1.650)        |
|                             | DBuP         | -0.015 (-0.137,0.107)            | -1.033 (-9.035,7.673)         |
| Firefighters                |              |                                  |                               |
|                             | BDCPP        | 0.050 (-0.150,0.251)             | 3.548 (-9.875,18.972)         |
|                             | BCEP         | -0.127 (-0.297,0.043)            | -8.418 (-18.610,3.049)        |
|                             | DBuP         | 0.018 (-0.195,0.231)             | 1.257 (-12.658,17.388)        |
| Office workers <sup>b</sup> |              |                                  |                               |
|                             | BDCPP        | -0.022 (-0.141,0.098)            | -1.491 (-9.325,7.020)         |

<sup>a</sup> Models adjusted for age and log(creatinine) values below LOD replaced with LOD/sqrt(2); <sup>b</sup> Among office workers only BDCPP had DF >70% to use in linear models.

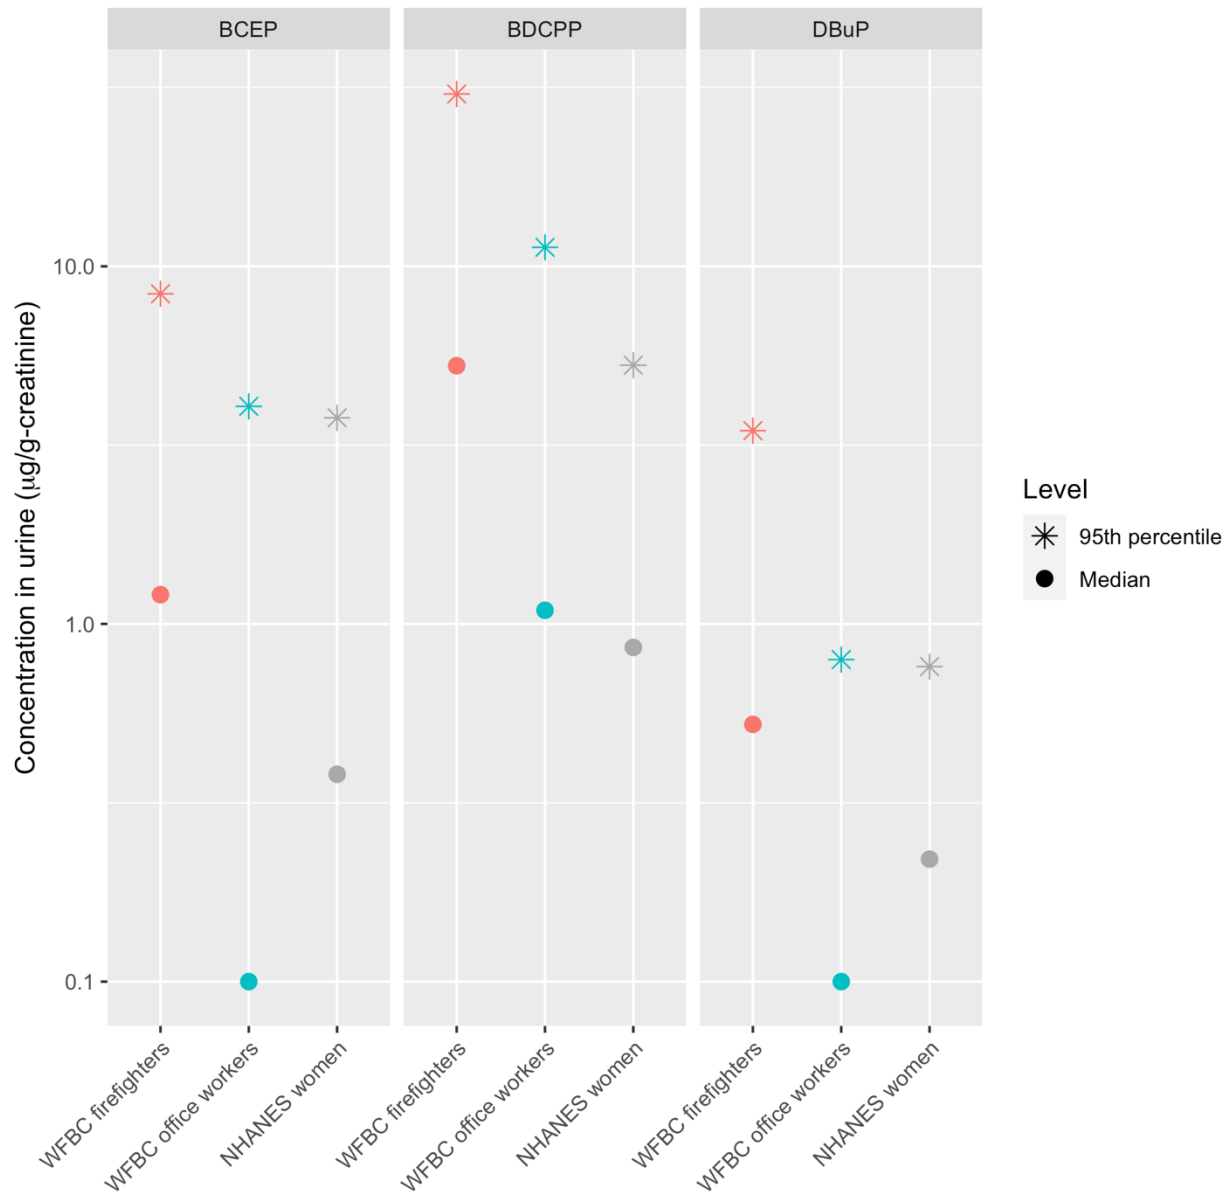

**Figure S1.** Median and 95th percentiles of flame retardants measured in urine ( $\mu\text{g/g-creatinine}$ ) from 2014-2015 WFBC firefighters and office workers compared to 2013-2014 NHANES adult women (ages 18 to 65) for compounds with at 70% DF among firefighters of the WFBC.
